# Supplementary material for: Does opportunistic testing bias cognitive performance in primates? Learning from drop-outs
Source: PubMed Central journal article supplement (PMC6426242; doi:10.1371/journal.pone.0213727), 2019-03-20
Supplement: pone.0213727.s002.pdf [file pone.0213727.s002.pdf]

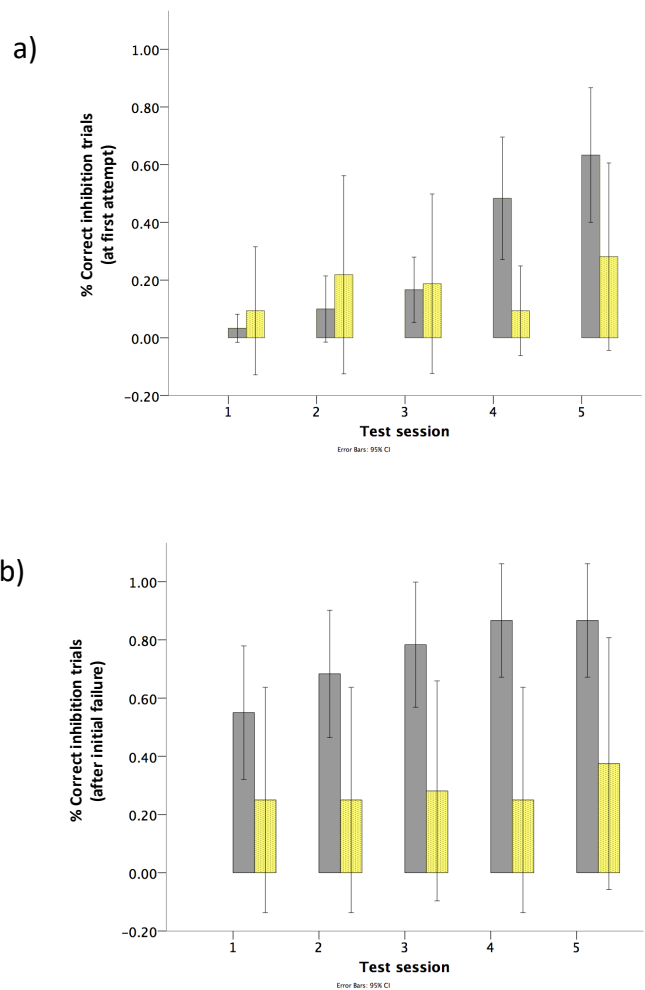

**S1 Fig. Performance in the 5 test sessions of the Detour-Reaching task.** Successful detour-reaching in the inhibition trials at (a) first attempt and (b) after initial failure to reach around the transparent barrier. Marmosets (grey solid bars)/squirrel monkeys (yellow dotted bars).
