# Supplementary material for: Does opportunistic testing bias cognitive performance in primates? Learning from drop-outs
Source: PubMed Central journal article supplement (PMC6426242; doi:10.1371/journal.pone.0213727), 2019-03-20
Supplement: pone.0213727.s003.pdf [file pone.0213727.s003.pdf]

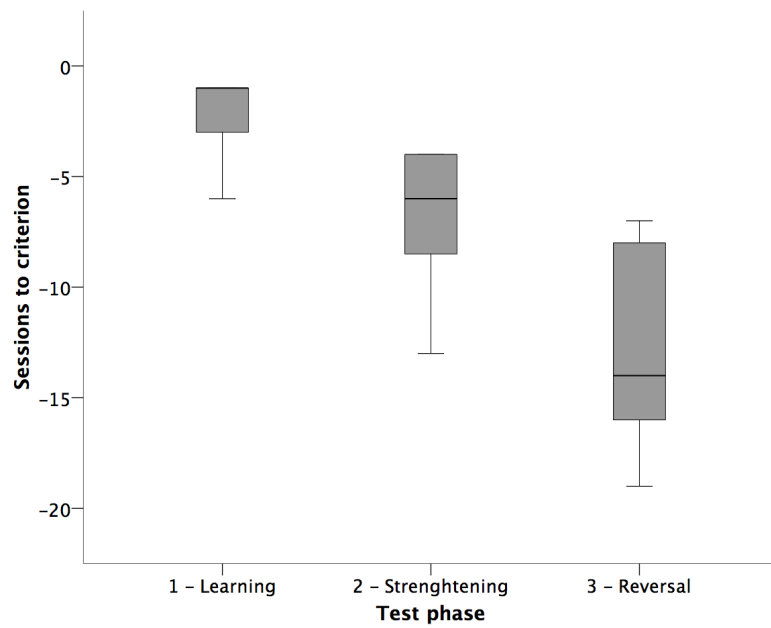

**S2 Fig. Number of test sessions to criterion in the 3 phases of the Reversal Learning task.** Fewer (12-trial) sessions indicate better performance, hence the negative prefix on the y-axis. Phase 1 - learning of the initial association between a pattern and a reward. Phase 2 - strengthening of the learned association. Phase 3 - reversal of the learned association.
